# Supplementary material
Source: PubMed Central journal article supplement (PMC10408261)
Supplement: jama-e2224836-s002.pdf [file jama-e2224836-s002.pdf]

## **Data Sharing Statement**

### **Data**

**Data available:** The data supporting the findings of this article are reported in the main text, figures and tables. Data to reproduce the results are available to qualified academic non-commercial researchers under a data access agreement.

### **Additional Information**

**Explanation for why data not available:** Limitations of Geisinger data
